# Supplementary material
Source: HighWire-hosted journal article supplement (https://cmajopen-stage.highwire.org/highwire/filestream/81315/field_highwire_adjunct_files/2/2019-0012-original-submission.pdf)
Supplement: 2019-0012-original-submission.pdf [file 2019-0012-original-submission.pdf]

**Research Manuscript**

Trends in location of physical cannabis retail stores across Canada one month following legalization

**Authors**

Daniel Myran MD, MPH<sup>1,2</sup>; Catherine R L Brown MD, MSc<sup>1,2</sup>; Peter Tanuseputro MD, MHSc<sup>1,3,4</sup>

**Affiliations**

<sup>1</sup>Ottawa Hospital Research Institute, Clinical Epidemiology Program, Ottawa, Ontario, Canada

<sup>2</sup>School of Epidemiology and Public Health, University of Ottawa, Ottawa, Ontario Canada

<sup>3</sup>Bruyère Research Institute, Ottawa, Ontario, Canada

<sup>4</sup>Department of Medicine, University of Ottawa, Ottawa, Ontario Canada

**Corresponding Author**

Daniel Myran  
Ottawa Hospital Research Institute  
1053 Carling Avenue, Box 693  
Ottawa, Ontario K1Y 4E9

Email: [DMYRA088@uottawa.ca](mailto:DMYRA088@uottawa.ca)

**Word count**

Abstract: 250 (max 250 words)

Manuscript: 2139 (max 2,500 words)

## Background

How provinces and territories regulate the location of cannabis stores is a key consideration when implementing cannabis legalization. We examined factors associated with access to cannabis stores across Canada following legalization.

## Methods

On November 17, 2018 we extracted the address and operating hours of every legal cannabis store in Canada from online government and private listings. We conducted a cross-sectional analysis examining measures of cannabis access including: outlet density; median distance to the nearest school; and relative availability of cannabis in low-income neighbourhoods. We compared these measures between province and territories (jurisdictions) with private- and government-run stores.

## Results

One month after legalization, there were 159 cannabis stores across Canada, with stores in every jurisdiction except Ontario and Nunavut. In jurisdictions with a private retail model compared to government model, there were 2.8 times the number of stores per capita, stores were open on average 17.9 more hours per week and stores were located closer to schools (median 169 meters). In both retail models, there was 2.3 times more access to stores for neighborhoods in the lowest income quintile compared to the highest income quintile.

## Conclusions

Jurisdictions with privately-run cannabis retail have greater access to cannabis and closer proximity to schools. In all jurisdiction cannabis access is greater in low income neighborhoods. These trends – based on experience from tobacco and alcohol research – may result in disproportionate cannabis-related health harms in vulnerable populations. Ongoing work is needed to determine the association between cannabis access and health-related harms, as well as the relative impact of online cannabis sales.

## INTRODUCTION

On October 17, 2018 Bill C-45, *The Cannabis Act*, came into effect allowing adults across Canada to purchase recreational cannabis legally.(1) The legislation has two stated main purposes: eliminating the illicit cannabis market and preventing youth from accessing cannabis.(2) Cannabis use is not benign and is associated with negative health outcomes including mental health problems such as psychosis and addiction,(3-6) cannabis-related motor vehicle collisions,(7) and poisonings, particularly unintentional ones among children.(8) Canada is the first high-income country to legalize the sale of recreation cannabis, and there is limited evidence to guide policies aimed at minimizing cannabis-related harms. Principles to mitigate harms, however, can be drawn from decades of alcohol and tobacco control policy, which suggest three of the most effective measures to decrease harmful substance use are regulating marketing and advertising, controlling the price of substances, and controlling the physical availability of sales.(9,10) This study examined the physical availability of cannabis sales in Canada.

Meeting the dual goals of legalizations will require balancing tight regulations on youth access to cannabis to minimize potential health harms while ensuring appropriate access to legal and regulated cannabis to eliminate the illicit market. While general principals governing the sale of cannabis are laid out in Bill C-45, the majority of regulations around retail fall to decisions by individual territories and provinces. As such, Canada is in the midst of a cannabis experiment, both nationally and at the provincial and territorial level. Although there are differences between each jurisdiction's decision to regulate the sale of cannabis, one helpful comparison is whether the region has adopted a privately-run or a government-run cannabis retail system. This decision is an important policy option available to governments when controlling overall access and placement of cannabis stores. Evidence from the alcohol literature suggests that government-run retail systems generally have lower access to alcohol sales and lowest levels of alcohol consumption.(11,12)

To help guide policy makers and further the discourse on regulating cannabis sales in Canada, we examined measures of access to the physical cannabis retail market one month following legislation and their association to key neighbourhood characteristics, including proximity to schools and low-income neighbourhoods. We also compared measures of cannabis access between jurisdictions with privately-run and government-run stores.

## METHODS

### Study Design

We conducted a cross-sectional analysis examining measures of access to cannabis retail stores one month following recreational cannabis legalization in Canada. Between October 29, 2018 and November 17, 2018, we collected data on the physical address and operating hours of every legal cannabis outlet through online government and private listings. On November 17, we verified the physical address of every legal cannabis

1  
2  
3 outlet, through a second online search of the listings. Using GIS software, we calculated  
4 measures of access to cannabis stores. We compared measures of cannabis access  
5 between jurisdictions with privately-run and government-run stores.  
6  
7

## 8 **Study Measures**

9 Our outcomes of interest included:

- 10 i. *Per capita density* of cannabis retail stores, measured by the number of outlets per  
11 100,000 population referend to the 2017 Canadian census population.(13)
- 12 ii. *Hours of operation*, measured as the mean total weekly hours of operation for  
13 stores.  
14
- 15 iii. *Proximity to schools*, measured by the median Euclidean distance from each  
16 cannabis outlet to the nearest primary, secondary, or tertiary school. We also  
17 calculated the proportion of cannabis outlets located 500 meters to a school.  
18
- 19 iv. *Concentration of cannabis outlets in low income neighbourhoods*. We measured this  
20 concentration by calculating the relative rate of cannabis outlets per capita  
21 between the highest and lowest neighborhood income quintile. Dissemination  
22 Area was chosen as the census unit most representative of neighborhoods.  
23  
24

25 We reported each of these four measures by each province/territory as well as  
26 aggregated by privately- or government-run retail model.  
27  
28

## 29 **Sources of data**

30 *Schools*. We used the education layer from the CanMap® content suite published by  
31 Desktop Mapping Technologies (DMTI) Inc. to map the location of all elementary  
32 schools, secondary schools, colleges, cégeps, and universities in Canada.  
33  
34

35 *Neighborhoods*. We chose Dissemination Area (DA) as the census unit most  
36 representative of neighborhoods. DAs are the smallest geographic unit for which census  
37 data is released, and generally contain between 400-700 individuals.(14)  
38  
39

40 *Neighborhood Income*. We used the variable QAIPPE from the PCCF+ to characterize DAs  
41 by neighbourhood income quintile.(15) This variable factors in the size of households  
42 and low income cut-offs and incorporates the relative poverty of DAs relative to  
43 surrounding DAs within the local Census Metropolitan Area (CMA). The most recent  
44 version of the PCCF+ uses data from the 2006 census. We also calculated income  
45 quintiles using the median before tax household income for each DA from the 2016  
46 census data for use in a sensitivity analysis  
47  
48  
49

## 50 **Data Analysis.**

51 All data analysis was conducted in STATA Version 15.1 (College Station, TX:  
52 StataCorp), and ArcMap 10.5.1 (Redlands, CA: Environmental Systems Research  
53 Institute). We used ArcMap to geocode the addresses and postal codes of cannabis  
54 stores to a corresponding latitude and longitude. We used ArcMap to calculate the  
55  
56  
57  
58  
59  
60

1  
2  
3 Euclidean distance between each cannabis store and the nearest school, as well as to  
4 calculate the number of cannabis stores located within a 1000-meter Euclidean buffer  
5 from the geographic centre of each DA.  
6  
7

8 We compared the mean weekly hours of operation between privately- and government-  
9 run retailers using a two-tailed t-test. Given the distance to the nearest school was  
10 skewed, we report medians and interquartile ranges. For proximity to schools, we used  
11 the Wilcoxon rank-sum test to compare median distance between the private and  
12 government models. We used descriptive statistics to examine the mean and variance of  
13 the number of cannabis outlets within 1000 meters of the geographic center of  
14 neighborhoods. As the mean (0.045) and variance (0.052) showed evidence of  
15 overdispersion (poisson goodness of fit test  $p < 0.0001$ ), we fit negative binomial  
16 regression models to estimate the association between neighborhood income quintiles  
17 and cannabis access. We offset the regressions by the total population of each DA and  
18 interpreted our exponentiated beta coefficients as rate ratios per capita. We also  
19 adjusted our models based on the population density of each dissemination area. Given  
20 the neighbourhood income variable QNIPPE uses data from the 2006 census, we  
21 conducted a sensitivity analysis using unadjusted neighbourhood income quintiles  
22 from the 2016 census. Statistical significance was set a priori at  $p < 0.05$ .  
23  
24  
25  
26  
27

## 28 **Research Ethics**

29 Given all data was publicly available, no research ethics was required.  
30  
31

## 32 **RESULTS**

33 One month following legalization, there were 159 cannabis outlets operating in Canada:  
34 105 privately-run stores in Newfoundland & Labrador, Manitoba, Saskatchewan, and  
35 Alberta and 54 government-run stores in Prince Edward Island, Nova Scotia, New  
36 Brunswick, Quebec, British Columbia, Yukon, and North West Territories. Every  
37 jurisdiction in Canada except Ontario and Nunavut had an operating physical cannabis  
38 store. We were not able to find the hours of operation for two stores in Newfoundland  
39 & Labrador, these stores were included in the study but excluded from the weekly  
40 hours of operation analysis. An additional, six stores had been granted a license to  
41 operate but had not yet opened and were excluded from analysis.  
42  
43  
44

45 Overall access to cannabis stores was higher in provinces that opted for a private retail  
46 model (Table 1). Regions with privately operated cannabis retail had 2.8 times the  
47 number of cannabis outlets per capita than regions with government operated cannabis  
48 retail (14.5 vs. 5.1 outlets per million population). On average, privately-run outlets  
49 were open 17.9 hours per week longer than government-run outlets (mean 80.9 vs. 63.0  
50 hours per week,  $p < 0.00001$ ). Private retail cannabis outlets were located 169 meters  
51 closer to a primary, secondary, or tertiary school than government outlets (median  
52 distance to nearest school 495 vs. 664 meters,  $p = 0.0415$ ). The proportion of cannabis  
53  
54  
55  
56  
57  
58  
59  
60

retails located within 500 meters of a school was higher in private models than government models (50% vs 38%).

Table 1: Cannabis retail outlets per capita and key neighbourhood characteristics

| Jurisdiction                            | Population (2017) | Cannabis Outlets | Outlets per 100,000 | Mean (SD) weekly hours of operation | Median distance (IQR) in meters to nearest school |
|-----------------------------------------|-------------------|------------------|---------------------|-------------------------------------|---------------------------------------------------|
| <b>PRIVATE CANNABIS RETAIL MODEL</b>    |                   |                  |                     |                                     |                                                   |
| Newfoundland & Labrador                 | 528,817           | 23               | 4.35                | 89.1 (16.1)                         | 523 (853)                                         |
| Manitoba                                | 1,338,109         | 11               | 0.82                | 80.9 (3.4)                          | 535 (1823)                                        |
| Saskatchewan                            | 1,163,925         | 9                | 0.86                | 59.3 (17.5)                         | 619 (428)                                         |
| Alberta                                 | 4,286,134         | 62               | 1.45                | 81.2 (7.2)                          | 466 (456)                                         |
| <b>TOTAL PRIVATE</b>                    | <b>7,316,985</b>  | <b>105</b>       | <b>1.45</b>         | <b>80.9 (12.7)</b>                  | <b>499 (511)</b>                                  |
| <b>GOVERNMENT CANNABIS RETAIL MODEL</b> |                   |                  |                     |                                     |                                                   |
| Prince Edward Island                    | 152,021           | 3                | 1.97                | 83 (0)                              | 479 (265)                                         |
| Nova Scotia                             | 953,869           | 12               | 1.26                | 77.3 (0.8)                          | 823 (504)                                         |
| New Brunswick                           | 759,655           | 20               | 2.63                | 71 (0)                              | 976 (843)                                         |
| Quebec                                  | 8,394,034         | 12               | 0.14                | 41.5 (12.9)                         | 507 (870)                                         |
| Yukon                                   | 38,459            | 1                | 2.60                | 47 (0)                              | 775 (0)                                           |
| North West Territories                  | 44,520            | 5                | 11.23               | 40 (17.4)                           | 501 (172)                                         |
| <b>TOTAL PUBLIC</b>                     | <b>10,342,558</b> | <b>53</b>        | <b>0.51</b>         | <b>63.0 (17.8)*</b>                 | <b>664 (558)**</b>                                |
| <b>GRAND TOTAL</b>                      | <b>17,659,543</b> | <b>158</b>       | <b>0.94</b>         | <b>74.8 (16.9)</b>                  | <b>531 (617)</b>                                  |

\*T-test comparing mean weekly hours of operation between private and government models,  $p < 0.00001$ .

\*\* Rank sum test comparing median distance in private and government models,  $p < 0.0415$ .

NB: British Columbia with one public cannabis retail outlet and Ontario and Nunavut each with no physical cannabis outlets were excluded from this analysis.

There were 28,763 DAs in Canada (not including BC, Nunavut, and Ontario). When we compared the number of cannabis stores located within 1,000 meters from the geographic centre (centroid) of each DA, private retail systems (RR 1.97, 95% CI 1.48-2.48) and government systems (RR 2.78, 95% CI 1.96-3.95) both had more outlets per capita in the lowest compared to the highest neighbourhood income quintile (Table 2). The sensitivity analyses using income quintiles calculated from the 2016 Canadian census did not change the direction of the reported effect sizes, see Appendix A.

Table 2. Negative binomial regression comparing the number of cannabis stores in neighborhoods with the lowest income quintile (Q1) to the highest income quintile (Q5)

| Canadian Jurisdiction <sup>a</sup>       | Q1:Q5(reference) Rate Ratio (95%CI) |                         |
|------------------------------------------|-------------------------------------|-------------------------|
|                                          | Model A <sup>c</sup>                | Model B                 |
| <b>PRIVATE CANNABIS RETAIL MODELS</b>    |                                     |                         |
| Newfoundland & Labrador                  | 1.76 (1.02 - 3.04)                  | 0.95 (0.56-1.61)        |
| Manitoba                                 | 6.46 (3.00-13.91)                   | 3.38 (1.53-7.51)        |
| Saskatchewan                             | b                                   | b                       |
| Alberta                                  | 2.48 (1.78-3.26)                    | 1.93 (1.41-2.65)        |
| <b>TOTAL PRIVATE</b>                     | <b>2.57 (2.01-3.31)</b>             | <b>1.97 (1.48-2.48)</b> |
| <b>GOVERNMENT CANNABIS RETAIL MODELS</b> |                                     |                         |
| Prince Edward Island                     | 3.48 (0.72-16.80)                   | 1.00 (0.16-7.29)        |
| Nova Scotia                              | 3.78 (1.87-7.63)                    | 3.00 (1.47-6.11)        |
| New Brunswick                            | 2.47 (1.25-4.87)                    | 1.72 (0.85-3.51)        |
| Quebec                                   | 4.15 (2.40-7.18)                    | 3.04(1.73-5.34)         |
| Yukon                                    | b                                   | b                       |
| North West Territories                   | 0.33 (0.03-3.16)                    | 0.32 (0.03-3.14)        |
| <b>TOTAL PUBLIC</b>                      | <b>3.26 (2.30-4.60)</b>             | <b>2.78 (1.96-3.95)</b> |

|                    |                  |                  |
|--------------------|------------------|------------------|
| <b>GRAND TOTAL</b> | 2.75 (2.25-3.36) | 2.27 (1.85-2.80) |
|--------------------|------------------|------------------|

NB: <sup>a</sup>British Columbia with one public cannabis retail outlet and Ontario and Nunavut each with no physical cannabis outlets were excluded from this analysis. <sup>b</sup>Unstable regression model due to lack of variation in income variable. <sup>c</sup> Both models are offset by the total population of a dissemination area. Model B adjusts for the population density of each DA in persons per square kilometer.

## INTERPRETATION

One month following legalization there were 159 cannabis stores operating in every province and territory in Canada except Ontario and Nunavut. Marked discrepancies in access to cannabis stores, including density of outlets and hours of sale, have emerged between provinces. In general, regions that have selected a privately-run model had greater access. In addition, stores in private models were located closer to schools than in government models. Finally, access to stores in both private and government models is concentrating in poor neighbourhoods compared to wealthy neighborhoods.

At present time, there is little evidence regarding the potential health impacts of increased access to cannabis retail in Canada. Decades of tobacco and alcohol research, however, has shown that increased access is associated with increased substance-related use and corresponding health harms.(16-19) The emerging trends of concentration of cannabis retail stores in low income neighborhoods and near schools are worrisome that higher cannabis-related health harms may develop in vulnerable populations, including youth and low socioeconomic status Canadians. This is also consistent with patterns seen in the alcohol and tobacco literature where tobacco and alcohol retail has been found to concentrate near schools and in low income neighborhood(20-22) and to disproportionately impact low socioeconomic status individuals.(23,24)

There are several possible explanations for the findings of increased concentration of cannabis stores in low income neighborhoods including lower levels of rent or property tax, higher anticipated market demand for cannabis in these areas, and commercial zoning bylaws which may exclude stores from higher income neighborhoods. Regardless, policy options are available that if properly implemented could prevent further concentrations of cannabis access and reduce access near poorer neighbourhoods and youth-oriented spaces. To limit concentrations of cannabis access, regions could add limits on the number of stores per capita and require minimum distances between stores. To prevent youth access, regions could enact minimum distances between cannabis stores and schools and other youth facilities. When placing these limits, it is important to consider the parameters of these regulations. For example, current regulation in Ontario will require a minimum separation distance of 150 meters between schools and nearest cannabis stores.(25) As the average individual can walk 150 meters in two minutes, we feel that this current regulation is unlikely to meaningfully reduce youth exposure to cannabis retail.

1  
2  
3  
4  
5  
6  
7  
8  
9  
10  
11  
12  
13  
14  
15  
16  
17  
18  
19  
20  
21  
22  
23  
24  
25  
26  
27  
28  
29  
30  
31  
32  
33  
34  
35  
36  
37  
38  
39  
40  
41  
42  
43  
44  
45  
46  
47  
48  
49  
50  
51  
52  
53  
54  
55  
56  
57  
58  
59  
60

There is currently a narrow policy window to create healthy public policy around cannabis, particularly in Canada's two largest provinces British Columbia and Ontario where regulations are still being finalized. Jurisdictions must find a reasonable balance between ensuring access to legally produced and regulated cannabis while limiting access to youth and other vulnerable populations. We note experience from the tobacco and alcohol industry has shown that increasing regulations on established industries is challenging.(26,27) We do not anticipate that regulating the cannabis industry will be different. As such, should evidence showing harms from excess cannabis access become stronger, attempts to close or place limits on cannabis retail stores likely will be challenged. The most prudent approach to protecting the public health of Canadian is to begin with stricter controls and await further evidence.

### Limitations

There are several limitations to this study. First, cannabis retail will continue to develop and trends from these preliminary findings may not accurately represent a more mature cannabis market. Further, our hand search of online listings may have underestimated the number of stores or misrepresented the hours of operation if governments and private retailers delayed updating these listing. Second, we chose one of the simplest measures of access to cannabis when comparing access between low income and high-income neighborhoods. While this measure is easy to explain and communicate it fails to capture important metrics of access such as clustering. Future work should use more sophisticated measures of access including travel time along road networks and spatial access measures.(12,28) Third, we did not account for other neighborhoods characteristics beyond population and population density (e.g. age and sex composition, ethnicity). Fourth, in our analysis of the distance between cannabis stores and the nearest school, the schools are represented as points and the actual boundaries of the school buildings and properties are not considered. As a result, cannabis retail stores are likely closer to schools that reported in this study. Finally, we limited this study to physical cannabis retails, yet all Canadian provincial and territorial governments are allowing online sales. Data around online sales are currently limited, and experts predict the majority of cannabis retail will be through bricks and mortar stores.(29) Further research is needed to understand the relative impact of online cannabis sales and its association with both physical cannabis sales and potential health impacts.

### CONCLUSION

One month following legalization there is greater access to cannabis in jurisdictions with privately-run cannabis retail system, including closer proximity to schools, compared to government-run retail systems. In addition, cannabis stores are concentrating in low income neighborhoods. Evidence from decades of tobacco and alcohol research suggests that this increased access may result in higher cannabis-related health harms. Further work should investigate whether there is an association

1  
2  
3 between cannabis access and health-related harms. In the interim, we recommend that  
4 policy makers and communities carefully consider whether these emerging trends  
5 reflect the desired balance between the dual goals of cannabis legalization – eliminating  
6 the illicit cannabis market and preventing youth from accessing cannabis – and make  
7 adjustments as necessary.  
8  
9

### 10 **Contributor's Statement**

11 DM, CB, and PT co-conceived and designed the study. DM & CB acquired the data, DM  
12 performed the analysis, and DM, CB, and PT interpreted the data. CB & DM co-drafted  
13 the article, and PT revised it critically for important intellectual content. All authors  
14 gave final approval of the version to be published and agreed to act as guarantors.  
15  
16  
17

### 18 **Acknowledgement**

19 The authors thank Mary Scott for her help in extracting data on cannabis locations and  
20 hours of operation.  
21  
22

### 23 **Funding**

24 This study received funding for open access publication from the Bruyere Centre for  
25 Individualized Health. The funders had no influence on the study design, analysis,  
26 interpretation, or reporting of the study.  
27  
28

- 29 1. Government Bill (House of Commons) C-45 (42-1) - Royal Assent - Cannabis Act -  
30 Parliament of Canada [Internet]. [cited 2018 Aug 1]. Available from:  
31 <http://www.parl.ca/DocumentViewer/en/42-1/bill/C-45/royal-assent>
- 32 2. Government of Canada. What you need to know about cannabis [Internet]. [cited  
33 2018 Dec 1]. Available from:  
34 [https://www.canada.ca/en/services/health/campaigns/cannabis/canadians.ht](https://www.canada.ca/en/services/health/campaigns/cannabis/canadians.html)  
35 [ml](https://www.canada.ca/en/services/health/campaigns/cannabis/canadians.html)
- 36 3. Large M, Sharma S, Compton MT, Slade T, Nielsen O. Cannabis Use and Earlier  
37 Onset of Psychosis. Arch Gen Psychiatry [Internet]. 2011 Jun 6 [cited 2018 Aug  
38 6];68(6):555. Available from:  
39 [http://archpsyc.jamanetwork.com/article.aspx?doi=10.1001/archgenpsychiatry.](http://archpsyc.jamanetwork.com/article.aspx?doi=10.1001/archgenpsychiatry.2011.5)  
40 [2011.5](http://archpsyc.jamanetwork.com/article.aspx?doi=10.1001/archgenpsychiatry.2011.5)
- 41 4. Crippa JA, Zuardi AW, Martín-Santos R, Bhattacharyya S, Atakan Z, McGuire P,  
42 et al. Cannabis and anxiety: a critical review of the evidence. Hum  
43 Psychopharmacol Clin Exp [Internet]. 2009 Oct 1 [cited 2018 Aug 6];24(7):515–23.  
44 Available from: <http://doi.wiley.com/10.1002/hup.1048>
- 45 5. Imtiaz S, Shield KD, Roerecke M, Cheng J, Popova S, Kurdyak P, et al. The burden  
46 of disease attributable to cannabis use in Canada in 2012. Addiction [Internet].  
47 2016 Apr [cited 2018 Jun 28];111(4):653–62. Available from:  
48 <http://www.ncbi.nlm.nih.gov/pubmed/26598973>
- 49 6. Chen C-Y, Storr CL, Anthony JC. Early-onset drug use and risk for drug  
50 dependence problems. Addict Behav [Internet]. 2009 Mar [cited 2018 Aug  
51  
52  
53  
54  
55  
56  
57  
58  
59  
60

- 6];34(3):319–22. Available from:  
<http://www.ncbi.nlm.nih.gov/pubmed/19022584>
7. Asbridge M, Hayden JA, Cartwright JL. Acute cannabis consumption and motor vehicle collision risk: systematic review of observational studies and meta-analysis. *BMJ*. 2012 Feb;344:e536.
  8. Wang GS, Le Lait M-C, Deakne SJ, Bronstein AC, Bajaj L, Roosevelt G. Unintentional Pediatric Exposures to Marijuana in Colorado, 2009-2015. *JAMA Pediatr* [Internet]. 2016 Sep 6 [cited 2018 Aug 6];170(9):e160971. Available from: <http://archpedi.jamanetwork.com/article.aspx?doi=10.1001/jamapediatrics.2016.0971>
  9. Giesbrecht N, Stockwell T, Kendall P, Strang R, Thomas G. Alcohol in Canada: reducing the toll through focused interventions and public health policies. *CMAJ* [Internet]. 2011 Mar 8 [cited 2018 Jun 3];183(4):450–5. Available from: <http://www.ncbi.nlm.nih.gov/pubmed/21324848>
  10. Levy DT, Tam J, Kuo C, Fong GT, Chaloupka F. The Impact of Implementing Tobacco Control Policies. *J Public Heal Manag Pract* [Internet]. 2018 Jan [cited 2018 Aug 6];1. Available from: <http://insights.ovid.com/crossref?an=00124784-900000000-99517>
  11. Giesbrecht N, Wettlaufer A. Reducing Alcohol-Related Harms and Costs in Ontario: A Provincial Summary Report. 2013 [cited 2018 Feb 7]; Available from: [http://www.camh.ca/en/research/news\\_and\\_publications/reports\\_and\\_books/Pages/default.aspx](http://www.camh.ca/en/research/news_and_publications/reports_and_books/Pages/default.aspx)
  12. Centers for Disease Control and Prevention. Guide for Measuring Alcohol Outlet Density. Atlanta, GA: Centers for Disease Control and Prevention, US Dept of Health and Human Services; 2017. [Internet]. [cited 2018 Dec 2]. Available from: <https://www.cdc.gov/alcohol/pdfs/CDC-Guide-for-Measuring-Alcohol-Outlet-Density.pdf>
  13. Statistics Canada. Population estimates on July 1st, by age and sex [Internet]. [cited 2018 Nov 30]. p. Table 17-10-0005-01. Available from: <https://www150.statcan.gc.ca/t1/tbl1/en/tv.action?pid=1710000501>
  14. Statistics Canada. Dissemination area (DA) [Internet]. Census Dictionary. 2015 [cited 2018 Sep 30]. Available from: <https://www12.statcan.gc.ca/census-recensement/2011/ref/dict/geo021-eng.cfm>
  15. Statistics Canada. Postal CodeOM Conversion File Plus (PCCF+) Version 6A;Reference Guide. Ottawa; 2013.
  16. Popova S, Giesbrecht N, Bekmuradov D, Patra J. Hours and Days of Sale and Density of Alcohol Outlets: Impacts on Alcohol Consumption and Damage: A Systematic Review. *Alcohol Alcohol* [Internet]. 2009 Sep 1 [cited 2018 May 2];44(5):500–16. Available from: <https://academic.oup.com/alcalc/article-lookup/doi/10.1093/alcalc/agg054>
  17. Henriksen L, Feighery EC, Schleicher NC, Cowling DW, Kline RS, Fortmann SP. Is adolescent smoking related to the density and proximity of tobacco outlets and retail cigarette advertising near schools? *Prev Med (Baltim)* [Internet]. 2008 Aug 1

- [cited 2018 Sep 12];47(2):210–4. Available from:  
<https://www.sciencedirect.com/science/article/pii/S0091743508002089>
18. Campbell CA, Hahn RA, Elder R, Brewer R, Chattopadhyay S, Fielding J, et al. The Effectiveness of Limiting Alcohol Outlet Density As a Means of Reducing Excessive Alcohol Consumption and Alcohol-Related Harms. *Am J Prev Med* [Internet]. 2009 Dec [cited 2017 Nov 28];37(6):556–69. Available from: <http://www.ncbi.nlm.nih.gov/pubmed/19944925>
  19. Cantrell J, Anesetti-Rothermel A, Pearson JL, Xiao H, Vallone D, Kirchner TR. The impact of the tobacco retail outlet environment on adult cessation and differences by neighborhood poverty. *Addiction* [Internet]. 2015 Jan 1 [cited 2018 Sep 12];110(1):152–61. Available from: <http://doi.wiley.com/10.1111/add.12718>
  20. Chaiton MO, Mecredy GC, Cohen JE, Tilson ML. Tobacco retail outlets and vulnerable populations in Ontario, Canada. *Int J Environ Res Public Health* [Internet]. 2013 Dec 17 [cited 2018 Sep 6];10(12):7299–309. Available from: <http://www.ncbi.nlm.nih.gov/pubmed/24351748>
  21. Slaunwhite AK, McEachern J, Ronis ST, Peters PA. Alcohol distribution reforms and school proximity to liquor sales outlets in New Brunswick. *Can J Public Health* [Internet]. 2018 Jan 22 [cited 2018 Nov 30];108(5–6):488. Available from: <http://journal.cpha.ca/index.php/cjph/article/view/6132>
  22. Ngamini Ngui A, Apparicio P, Philibert M, Fleury M-J. Neighborhood characteristics associated with the availability of alcohol outlets in quebec, Canada. *J Addict* [Internet]. 2015 [cited 2018 Feb 6];2015:876582. Available from: <http://www.ncbi.nlm.nih.gov/pubmed/25810946>
  23. Alcohol Harm in Canada Examining Hospitalizations Entirely Caused by Alcohol and Strategies to Reduce Alcohol Harm. [cited 2017 Oct 3]; Available from: <https://www.cihi.ca/sites/default/files/document/report-alcohol-hospitalizations-en-web.pdf>
  24. Jones L, Bates G, McCoy E, Bellis MA. Relationship between alcohol-attributable disease and socioeconomic status, and the role of alcohol consumption in this relationship: a systematic review and meta-analysis. *BMC Public Health* [Internet]. 2015 Dec 18 [cited 2018 May 1];15(1):400. Available from: <http://bmcpublichealth.biomedcentral.com/articles/10.1186/s12889-015-1720-7>
  25. Association of Municipalities of Ontario. Municipal Cannabis Update. 2018.
  26. Saloojee Y, Dagli E. Tobacco industry tactics for resisting public policy on health. *Bull World Health Organ* [Internet]. 2000 [cited 2018 Nov 29];78:902–10. Available from: [https://www.scielo.org/scielo.php?pid=S0042-96862000000700007&script=sci\\_arttext](https://www.scielo.org/scielo.php?pid=S0042-96862000000700007&script=sci_arttext)
  27. Miller D, Harkins C. Corporate strategy, corporate capture: Food and alcohol industry lobbying and public health. *Crit Soc Policy* [Internet]. 2010 Nov 1 [cited 2018 Nov 29];30(4):564–89. Available from: <http://journals.sagepub.com/doi/10.1177/0261018310376805>
  28. Holmes J, Guo Y, Maheswaran R, Nicholls J, Meier PS, Brennan A. The impact of spatial and temporal availability of alcohol on its consumption and related harms:

1  
2  
3  
4  
5  
6  
7  
8  
9  
10  
11  
12  
13  
14  
15  
16  
17  
18  
19  
20  
21  
22  
23  
24  
25  
26  
27  
28  
29  
30  
31  
32  
33  
34  
35  
36  
37  
38  
39  
40  
41  
42  
43  
44  
45  
46  
47  
48  
49  
50  
51  
52  
53  
54  
55  
56  
57  
58  
59  
60

a critical review in the context of UK licensing policies. *Drug Alcohol Rev*  
[Internet]. 2014 Sep [cited 2017 Nov 28];33(5):515–25. Available from:  
<http://www.ncbi.nlm.nih.gov/pubmed/25186193>

29. Deloitte. A society in transition, an industry ready to bloom 2018 cannabis report. 2018.

Confidential

## Appendix A

Sensitivity analyses using income quintiles from the 2016 Canadian census. Income quintiles were calculated from the median before tax income of economic families.

Table 3. Negative binomial regression comparing the number of cannabis stores in neighborhoods in the lowest income quintile (Q1) to the highest income quintile (Q5)

| Canadian Jurisdiction <sup>a</sup>       | Q1:Q5(reference) Rate Ratio (95%CI) |                         |
|------------------------------------------|-------------------------------------|-------------------------|
|                                          | Model A <sup>c</sup>                | Model B                 |
| <b>PRIVATE CANNABIS RETAIL MODELS</b>    |                                     |                         |
| Newfoundland & Labrador                  | 1.91 (0.97 - 3.34)                  | 1.33 (0.71-2.48)        |
| Manitoba                                 | 9.18 (3.63-23.16)                   | 5.11 (1.91-13.66)       |
| Saskatchewan                             | 1.93 (0.56-6.69)                    | 1.98 (0.57-6.86)        |
| Alberta                                  | 3.81 (2.56-5.58)                    | 3.02 (2.04-4.50)        |
| <b>TOTAL PRIVATE</b>                     | <b>3.17 (2.46-4.10)</b>             | <b>2.28 (1.74-2.99)</b> |
| <b>GOVERNMENT CANNABIS RETAIL MODELS</b> |                                     |                         |
| Prince Edward Island                     | b                                   | b                       |
| Nova Scotia                              | 8.59 (2.08-35.40)                   | 5.83 (1.37-24.75)       |
| New Brunswick                            | 3.08 (0.74-12.76)                   | 2.46 (0.59-10.30)       |
| Quebec                                   | 4.88 (2.26-10.54)                   | 2.80 (1.25-6.27)        |
| Yukon                                    | b                                   | b                       |
| North West Territories                   | b                                   | b                       |
| <b>TOTAL PUBLIC</b>                      | <b>3.16 (2.04-4.93)</b>             | <b>2.79 (1.79-4.35)</b> |
| <b>GRAND TOTAL</b>                       | <b>3.86 (3.14-4.76)</b>             | <b>2.90 (2.34-3.60)</b> |

NB: <sup>a</sup>British Columbia with one public cannabis retail outlet and Ontario and Nunavut each with no physical cannabis outlets were excluded from this analysis. <sup>b</sup>Unstable regression model due to lack of variation in income variable. <sup>c</sup>Both models are offset by the total population of a dissemination area. Model B adjusts for the population density of each DA in persons per square kilometer.
